# Supplementary material
Source: PubMed Central journal article supplement (PMC6331281)
Supplement: NIHMS1510552-supplement-Supplemental_Figure_2_Permission.pdf [file NIHMS1510552-supplement-Supplemental_Figure_2_Permission.pdf]

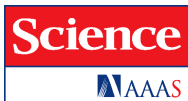

## License to Publish

The following Grant of License ("License") must be signed and returned to the American Association for the Advancement of Science ("AAAS") before a manuscript can be accepted for publication. If the copyright in the contribution is owned by the author's employer, the employer or an authorized representative must sign this form. In the event that AAAS decides not to publish the Work, this License shall be null and void.

|                                                                                                                                                                                                                                                                                                                                                                                                                                                                                                                                                                                                                                                                                                                                                                                                                                                                                                                                                                                                                                                                                                                                                                                                                                                                                                                                                                                                                                                                                                                                                                                                                                                                                                                                                                                                                                                                                                                                                                                                                                                                                                                                                                                                                                                                                                  |                                                                                                                                                                                                                                                                                                                                                                                                                                                                                                                                                                                                                                                                                                                                                                                                                                                                                                                                                                                                                                                                                                                                                                                                                                                                                                                                                                                                                                               |
|--------------------------------------------------------------------------------------------------------------------------------------------------------------------------------------------------------------------------------------------------------------------------------------------------------------------------------------------------------------------------------------------------------------------------------------------------------------------------------------------------------------------------------------------------------------------------------------------------------------------------------------------------------------------------------------------------------------------------------------------------------------------------------------------------------------------------------------------------------------------------------------------------------------------------------------------------------------------------------------------------------------------------------------------------------------------------------------------------------------------------------------------------------------------------------------------------------------------------------------------------------------------------------------------------------------------------------------------------------------------------------------------------------------------------------------------------------------------------------------------------------------------------------------------------------------------------------------------------------------------------------------------------------------------------------------------------------------------------------------------------------------------------------------------------------------------------------------------------------------------------------------------------------------------------------------------------------------------------------------------------------------------------------------------------------------------------------------------------------------------------------------------------------------------------------------------------------------------------------------------------------------------------------------------------|-----------------------------------------------------------------------------------------------------------------------------------------------------------------------------------------------------------------------------------------------------------------------------------------------------------------------------------------------------------------------------------------------------------------------------------------------------------------------------------------------------------------------------------------------------------------------------------------------------------------------------------------------------------------------------------------------------------------------------------------------------------------------------------------------------------------------------------------------------------------------------------------------------------------------------------------------------------------------------------------------------------------------------------------------------------------------------------------------------------------------------------------------------------------------------------------------------------------------------------------------------------------------------------------------------------------------------------------------------------------------------------------------------------------------------------------------|
| <p>1. In consideration of publication by AAAS in one of its <i>Science</i> journals of the work currently titled _____ and all associated supplemental materials, data, audio and/or video files (the "Work") and authored by _____ ("Author"), the sole and exclusive, irrevocable right is hereby granted to AAAS to publish, reproduce, distribute, transmit, display, store, translate, create derivative works from and otherwise use the Work in any form, manner, format, or medium, whether now known or hereafter developed, throughout the world and in any language, for the entire duration of any such right and any renewal or extension thereof and to permit/sublicense others to do any or all of the foregoing as well.</p>                                                                                                                                                                                                                                                                                                                                                                                                                                                                                                                                                                                                                                                                                                                                                                                                                                                                                                                                                                                                                                                                                                                                                                                                                                                                                                                                                                                                                                                                                                                                                    | <p>5. In order that we may preserve the commercial value of our publication, Author agrees to obtain authorization from AAAS in advance for any uses not expressly described in paragraphs 3 or 4.</p>                                                                                                                                                                                                                                                                                                                                                                                                                                                                                                                                                                                                                                                                                                                                                                                                                                                                                                                                                                                                                                                                                                                                                                                                                                        |
| <p>2. Ownership of the copyright shall remain with the Author, subject to the rights granted to AAAS in paragraph 1. AAAS shall be the holder of title for purpose of registration.</p>                                                                                                                                                                                                                                                                                                                                                                                                                                                                                                                                                                                                                                                                                                                                                                                                                                                                                                                                                                                                                                                                                                                                                                                                                                                                                                                                                                                                                                                                                                                                                                                                                                                                                                                                                                                                                                                                                                                                                                                                                                                                                                          | <p>6. Author warrants and represents that the Work is original, that all the facts contained therein are true and accurate, and that the Work has not been published elsewhere, and does not infringe upon any copyright, proprietary, or personal right of any third party. If the Work contains any material that is owned or controlled by a third party, Author certifies that he/she has obtained permission for its use (please attach evidence of this) and that the material is clearly acknowledged within the text.</p>                                                                                                                                                                                                                                                                                                                                                                                                                                                                                                                                                                                                                                                                                                                                                                                                                                                                                                             |
| <p>3. <b>Author also retains the non-exclusive right to use the Work in the following ways without further permission but only after publication of the Work by AAAS and subject to the requirement that credit be given to its first publication in the appropriate issue of the applicable <i>Science</i> journal:</b> 1) Reprint the Work in print collections of Author's own writings; 2) Reprint the Work in print format for inclusion in a thesis or dissertation that the Author writes; 3) Present the Work orally; 4) Reproduce the Work for use in courses the Author is teaching (If the Author is employed by an academic institution, that institution may also reproduce the Work for course teaching); 5) Distribute photocopies or a PDF of the Work to colleagues for non-commercial purposes only (providing that recipients are informed that they may not further distribute or copy the Work); 6) Post a copy of the "Accepted Version" of the Work (the version of the paper accepted for publication by AAAS including changes resulting from peer review but prior to AAAS's copy editing and production) on the Author's personal website or in his/her Institution's archival database repository, provided a hyperlink to the Work on the <i>Science</i> website is included and provided the "Accepted Version" is marked with the following notice: "This is the author's version of the work. It is posted here by permission of the AAAS for personal use, not for redistribution. The definitive version was published in <i>Science</i> Journal Title {VOL#, (DATE)}, doi: {doi number for your manuscript}"; <b>7) Reuse figures and tables created by the Author in future works the Author writes;</b> 8) The Author's employer may use the "Accepted Version" of the Work for non-commercial research purposes ("Non-commercial research purposes" is defined as research undertaken for purposes other than (a) a profit motive, (b) for commercial exploitation, (c) monetary gain derived from the outcome of the research, (d) research undertaken on behalf of a commercial entity, or (e) other similar purposes); 9) Author may use or authorize use of Supporting Online Material associated with the Work for any purpose and in any format.</p> | <p>7. Author further warrants and represents that to the extent that Author's right and ability to grant to AAAS all rights specified in Paragraph 1 above is or might be limited by a university policy or other institutional restrictions, Author has obtained a waiver of such policy or restrictions from the applicable university or institution.</p>                                                                                                                                                                                                                                                                                                                                                                                                                                                                                                                                                                                                                                                                                                                                                                                                                                                                                                                                                                                                                                                                                  |
| <p>4. In addition to the rights retained by the Author in 3 above, authors of research articles, reports, brevvia, reviews, or technical comments arising out of grants awarded no earlier than 2 May 2005 who are required by their funding agencies to make their research results publicly available may do so under the following conditions: The Author may cause the posting, no sooner than 6 months after final publication of the Work by AAAS, of the "Accepted Version" of the Work in his/her funding body's archive or designated repository provided it includes a hyperlink to the final published version on the <i>Science</i> website and the full reference citation and provided that further use of the posted article copy is restricted to non-commercial research purposes ("Non-commercial research purposes" is defined as research undertaken for purposes other than (a) a profit motive, (b) for commercial exploitation, (c) monetary gain derived from the outcome of the research, (d) research undertaken on behalf of a commercial entity, or (e) other similar purposes). The "Accepted Version" shall be defined as the version of the paper accepted for publication by AAAS including changes resulting from peer review but prior to AAAS's copy editing and production. This policy does not apply to article types that are not specifically mentioned above. The Author must ensure that the "Accepted Version" is not released on his/her funding body's archive or repository until 6 months after its final publication date in a <i>Science</i> journal.</p>                                                                                                                                                                                                                                                                                                                                                                                                                                                                                                                                                                                                                                                                                       | <p><b>By signing this agreement, Author warrants that he/she has the full power to enter into this agreement. This agreement shall remain in effect throughout the term of copyright in the Work and may not be revoked without the express written consent of both parties.</b></p> <p><b>This Agreement shall be governed and construed, and any dispute arising hereunder resolved, in accordance with the laws of the District of Columbia, United States of America, without resort to the conflicts of laws principles thereof.</b></p> <p>_____<br/> <b>Author's Name (please print)</b></p> <p>_____<br/> <b>Author's Signature</b></p> <p><b>For Authors employed by the United States Government:</b> I attest that the above article was written as part of my official duties as an employee of the U.S. Government (and therefore the article is in the public domain).</p> <p>_____<br/> Author's Name (please print)</p> <p>_____<br/> Author's Signature</p> <p><b>For works created under U.S. Government Contract:</b> Please sign the top portion of this agreement. The AAAS recognizes the U.S. Government's non-exclusive rights to use the Work for non-commercial, governmental purposes where such rights are established in the grant or contract. <b>Works subject to Crown Copyright:</b> For authors employed by the Australian, Canadian, and/or UK Governments, please contact AAAS for an alternate form.</p> |
